# Supplementary material for: A facile and novel route to unprecedented manganese C4cumulenic complexes
Source: Royal Society of Chemistry journal article supplement (doi:10.1039/b304882a), 2003-01-01
Supplement: b304882a.doc [file b304882a.doc]

# Supplementary Information

# A Facile and Novel Route to Unprecedented Manganese C4 Cumulenic Complexes

##### Koushik Venkatesan, Francisco J. Fernández, Olivier Blacque, Thomas Fox, Montserrat Alfonso, Helmut W. Schmalle and Heinz Berke*

*Anorganisch-Chemisches Institut der Universität Zürich, Winterthurerstrasse 190, CH-8057 Zürich, Switzerland*

Experimental details

‡ All operations were performed using standard Schlenck or Glove-box techniques.

*Synthesis* of2a. To a toluene (10 mL) solution of 1a (0.1 g, 0.45 mmol) was added a toluene (10 mL) solution of dmpe (0.07 g, 0.45 mmol) and Ph3Sn-CC-CC-SnPh3 (0.33 g, 0.45 mmol). The solution was stirred at room temperature for 2 hours to give a dark red solution. The solvent was removed in vacuo to afford a dark red solid of 2a. Yield 98%. Anal calc. for C51H51MnP2Sn2: C, 60.16; H, 5.05 found C, 60.46; H, 5.08. 1H NMR (C6D6, 300 MHz, 20 C):  7.93, (m, 12H, C6*H5*), 7.70 (m, 18H, C6*H5*), 4.13 (5H, C5*H5*), 1.72 (2H, PC*H*2), 1.28 (6H, PC*H*3), 1.16 (2H, PC*H*2), 0.57 (6H, PC*H*3). 31P 1H-NMR (C6D6, 121.5 MHz, 20°C):  93.8 (s, 2P). 13C 1H- NMR (C6D6, 125 MHz, 20 C):  327.5 (m, 1C, Mn-*C*), 141.0 (3C, Ci, *C6*H5), 139.5 (3C, Ci, *C6*H5), 137.8 (12C, *C6*H5), 137.3 (12C, *C6*H5), 114.8 (m, 1C, =*C*), 91.8 (1C, *C*C), 88.0 (1C, C*C-*Sn(C6H5)), 83.8 (5C, *C*5H5), 30.8 (2C, P*C*H2), 23.5 (2C, P*C*H3), 21.3 (2C, P*C*H3). 119Sn NMR (C6D6, 20°C)  -130 (t, 77.0 Hz), -162 (s). IR (CH2Cl2, 20 C): 1986 cm-1 (CC), 1949cm-1 (CC), 1595 cm-1 (CC), 1550 cm-1 (CC).

*Synthesis* of **2b**. The same procedure was adopted as above using **1b** as the starting component. Yield 98 %. Anal. Calc. for C52H53MnP2Sn2: C, 60.50; H, 5.17; found C, 6.20; H, 5.34. 1H NMR (C6D6, 300 MHz, 20 C):  7.95, (m, 12H, C6*H5*), 7.69 (m, 18H, C6*H5*), 4.15 (2H, C5*H*4), 3.74 (2H, C5*H*4), 2.01 (3H, C5H4C*H*3), 1.71 (2H, PC*H*2), 1.27 (6H, PC*H*3), 1.24 (2H, PC*H*2), 0.59 (6H, PC*H*3). 31P 1H-NMR (C6D6, 121.5 MHz, 20°C):  92.8 (s, 2P). 13C 1H- NMR (C6D6, 125 MHz, 20 C):  328.2 (m, 1C, Mn-C), 141.0 (3C, Ci, Ph), 139.3 (3C, Ci, Ph), 137.6 (12C, *C6*H5), 137.1 (12C, *C6*H5), 115.8 (1C, m, =C), 98.3 (1C, Ci, *C5*H4Me), 89.9 (*C*C), 86.7 (C*C*-Sn), 85.2 (2C, *C5*H4), 80.8 (2C, *C5*H4), 30.6 (2C, P*C*H2), 23.3 (2C, P*C*H3), 22.4 (1C, C5H4*C*H3), 21.0 (2C, PMe3). 119Sn NMR (C6D6, 20°C)  -132 (t, 77.0 Hz), -162 (s). IR (CH2Cl2, 20 C): 1988 cm-1 (CC), 1947 cm-1 (CC), 1598 cm-1 (CC), 1550 cm-1 (CC).

*Synthesis* of **3a.** A benzene (20 mL) solution of **2a** (0.080 g) was irradiated for 5 hours using a 125 W medium pressure mercury lamp. After removal of the solvent and extraction of the residue with diethyl ether, the diethyl ether solution was concentrated in vacuo and cooled to –30ºC to obtain green crystals of **3a**. Yield 80 %. Anal. calc. for C51H51MnP2Sn2 C, 60.15; H, 5.04 found C, 60.21; H, 5.30. 1H NMR (C4D8O, 300 MHz, 20 C):  7.39 (m, 12H, C6*H5*), 7.17 (m, 18H, C6*H5*), 4.41 (s, 5H, C5*H5*), 1.95 (br, 2H, PC*H*2), 1.14 (br, 14H, PC*H*2 and PC*H*3). 31P 1H-NMR (C4D8O, 121.5 MHz, 20°C):  90.7 (s). 13C 1H- NMR (C4D8O, 125 MHz, 20 C):  266.5 (1C, *C*), 140.0 (1C, *C4*), 130.8 (1C, *C2*), and 124.8 (1C, *C3*) (Mn=C1=C2=C3=C4), 84.0 (5C, *C5*H5), 31.3 (2C, m, P*C*H2), 22.4 (2C, P*C*H3), 20.5 (2C, P*C*H3). 119Sn NMR (C4H8O, 20°C):  -125.6 (t, JPSn = 64 Hz). IR (CH2Cl2, 20 C): 1596 cm-1 (CC), 1548 cm-1 (CC).

*Synthesis* of **3b**. The same procedure was adopted as above using 2b (0.080 g) as the starting material. Yield 80 %. Anal. calc. for C52H53MnP2Sn2: C, 60.50; H, 5.17; found C, 60.72; H, 5.27. 1H NMR (C4D8O, 300 MHz, 20 C):  7.40 (m, 12H, C6*H5*), 7.16 (m, 18H, C6*H5*), 4.50 (2H, C5*H*4), 3.97 (2H, C5*H*4), 1.95 (br, 2H, PC*H*2), 1.93 (s, 3H, C5H4C*H*3), 1.17 (br, 14 H, PC*H*2 and PC*H*3). 31P 1H-NMR (C4D8O, 121.5 MHz, 20°C):  91.6 (s, 2P). 13C 1H- NMR (C4D8O, 125 MHz, 20 C):  267.5 (1C, *C*), 139.9 (1C, *C4*), 131.6 (1C, *C2*) and121.4(1C, *C3*) (Mn=C1=C2=C3=C4), 100.2 (C5H4, Ci), 85.2 (2C, *C*5H4), 80.0 (2C, *C*5H4), 30.0 (2C, m, P*C*H2), 22.3 (2C, P*C*H3), 21.4 (1C, C5H4*C*H3), 20.0 (2C, P*C*H3). 119Sn NMR (C4H8O, 20°C):  -122.0 (t, JPSn = 65.0 Hz). IR (CH2Cl2, 20 C):1594 cm-1 (CC), 1552 cm-1 (CC).

*Synthesis* of **4a**. To a mixture of **3a** (0.020 g, 0.020 mmol) and TBAF (0.040 mmol) were added 0.75 mL of THF-d8 at –20°C. The temperature was raised to –5°C and the species **4a** was observed as the only Mn containing complex present in the solution after 5 minutes. Spectroscopic data for **4a**: 1H NMR (C4D8O, 300 MHz, -40 C):  4.56 (s, 5H, C5H5), 2.04 (m, 2H, PC*H*2), 1.93 (t, JPH = 2.01 Hz, 2H, =C*H2*), 1.84 (m, 2H, PC*H*2), 1.28 (m, 6H, PC*H*3), 0.57 (m, 6H, PC*H*3). 31P 1H-NMR (C4D8O, 121.5 MHz, -40°C):  93.07 (s, 2P). 13C 1H- NMR (C6D6, 125 MHz, -40 C):  281.8 (1C, *C*), 44.4 (1C, *C4*), 158.7 (1C, *C2*) and 141.0 (1C, *C3*) (Mn=C1=C2=C3=C4), 83.2 (5C, *C*5H5)**,** 31.0 (2C, m, P*C*H2), 22.8 (2C, P*C*H3), 20.3 (2C, P*C*H3).

*Synthesis* of **4b**. The same procedure was adopted as above using **3b** (0.080 g) as the starting material. 1H NMR (C4D8O, 300 MHz, -40 C):  4.50 (2H, C5*H*4), 3.97 (2H, C5*H*4), 2.07(m, 2H, PC*H*2), 2.03 (s, 3H, C5H4CH3), 1.93 (t, JPH = 2.01 Hz, 2H, =C*H2*), 1.82 (m, 2H, PC*H*2), 1.25 (m, 6H, PC*H*3), 0.57 (m, 6H, PC*H*3). 31P 1H-NMR (C4D8O, 121.5 MHz, -40°C):  94.32 (s, 2P). 13C 1H- NMR (C6D6, 125 MHz, -40 C):  280.8 (1C, *C*), 157.9 (1C, *C2*) and 140.2 (1C, *C3*), 44.3 (1C, *C4*), (Mn=C1=C2=C3=C4), 100.2 (C5H4, Ci), 85.2 (2C, *C*5H4), 80.0 (2C, *C*5H4),31.0 (2C, m, P*C*H2), 22.8 (2C, P*C*H3), 21.4 (1C, C5H4*C*H3), 20.3 (2C, P*C*H3).

# Computational details used for the Amsterdam Density Functional program package ADF, release 2002.02.1

Energies and geometries were calculated by using the local exchange-correlation potential of Vosko, Wilk, and Nusair2 with the addition of gradient corrections due to Becke3 for the exchange energy and Perdew4 for the correlation energy. The standard triple-
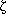
 basis sets with one set of polarization functions were employed for all non-hydrogen atoms (ADF database TZP) while the standard double-
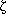
 STO basis was applied for H atoms (ADF database DZP). The frozen-core approximation was applied for the 1s electrons of C atoms, for the 1s-2p electrons of phosphorus and manganese, and for the 1s-4d electrons of tin atoms.

# References

**ADF - Optimized geometries and bonding energies**

CARTESIAN COORDINATES OF THE MODEL SYSTEM **3a-Me**

+++++++++++++++++++++++++++++++++++++++++++++++

C C_tzp.1s

H H_dzp

P P_tzp.2p

Mn Mn_tzp.2p

Sn Sn_tzp.4d

GEOMETRY OPTIMIZATION

Final Geometry (x,y,z in Angstrom)

Mn 0.039099 3.984713 -0.385781

P 1.336730 4.128518 1.371178

C 0.027642 2.219039 -0.244726

P -1.588315 4.055915 1.077314

H 2.401468 5.322328 -1.452623

C 1.357220 5.105006 -1.666405

C 0.236317 5.937209 -1.333291

H 1.476172 3.144374 -2.753555

H 0.274411 6.895018 -0.820316

C -0.938120 5.282407 -1.818098

H -1.956954 5.653928 -1.730192

C -0.547853 4.074629 -2.472602

H -1.213474 3.351234 -2.935245

C 0.873468 3.966991 -2.378677

H -2.302263 5.280135 1.361027

C -0.998401 3.584852 2.810309

H -2.759909 3.224953 0.983111

C 0.388059 4.200727 3.022446

H 2.247471 5.227831 1.574892

H 2.291105 3.092320 1.671847

H 0.302793 5.266463 3.285121

H -0.945406 2.485769 2.814779

H -1.722680 3.901314 3.574063

H 0.952767 3.698957 3.820596

C 0.031321 0.925162 -0.188022

C 0.040854 -0.368640 -0.158650

C 0.042768 -1.680157 -0.127089

Sn 1.979896 -2.755826 0.011597

Sn -1.946643 -2.698560 -0.089422

C -1.984148 -4.460108 -1.445829

C -3.501524 -1.204094 -0.701731

C -2.343321 -3.471896 1.899791

C 3.523825 -1.415326 0.913546

C 2.562139 -3.571113 -1.949138

C 1.521505 -4.505938 1.265314

H -3.048214 -0.472927 -1.382897

H -3.886545 -0.683964 0.185060

H -4.326809 -1.722635 -1.208457

H -1.565799 -4.197003 2.183153

H -3.316332 -3.986726 1.900413

H -2.366319 -2.669266 2.651763

H -1.116617 -5.110352 -1.260791

H -1.963715 -4.130409 -2.495017

H -2.905442 -5.034433 -1.265952

H 2.407160 -5.149380 1.373972

H 0.726134 -5.093835 0.782052

H 1.177788 -4.197167 2.262664

H 3.568574 -4.011560 -1.884746

H 2.572014 -2.774565 -2.708791

H 1.845948 -4.346569 -2.256397

H 4.526986 -1.829308 0.745817

H 3.336471 -1.333626 1.992497

H 3.450716 -0.419563 0.457451

Total Charge: 0.00

Total Bonding Energy:

-10.393384043550150 hartree

-6521.95 kcal/mol

-27287.83 kJ/mol

CARTESIAN COORDINATES OF THE MODEL SYSTEM **4a-H**

++++++++++++++++++++++++++++++++++++++++++++++++

C C_tzp.1s

H H_dzp

P P_tzp.2p

Mn Mn_tzp.2p

Sn Sn_tzp.4d

GEOMETRY OPTIMIZATION

Final Geometry (x,y,z in Angstrom)

Mn 0.057018 3.945324 -0.398213

P 1.351916 4.120378 1.361689

C 0.029120 2.190433 -0.238598

P -1.568754 4.069844 1.061678

H 2.400051 5.320095 -1.469464

C 1.357109 5.092158 -1.677944

C 0.229999 5.908369 -1.329121

H 1.489601 3.146448 -2.792570

H 0.260426 6.860755 -0.805433

C -0.940300 5.247443 -1.815922

H -1.962336 5.608779 -1.721383

C -0.539822 4.052511 -2.487574

H -1.201778 3.327821 -2.953931

C 0.881208 3.957877 -2.402649

H -2.238249 5.321774 1.326527

C -0.993027 3.596286 2.796313

H -2.764578 3.276518 0.964404

C 0.400765 4.195530 3.010826

H 2.239132 5.241207 1.542739

H 2.326277 3.105793 1.663794

H 0.328165 5.260277 3.280623

H -0.954916 2.496651 2.803265

H -1.715133 3.924203 3.557115

H 0.960137 3.682405 3.805121

C 0.015240 0.891538 -0.152673

C 0.009930 -0.390447 -0.109799

C -0.001752 -1.715109 -0.065023

H 0.924771 -2.289977 0.020203

H -0.938615 -2.277220 -0.118021

Total Charge: 0.00

Total Bonding Energy:

-6.131917552217823 hartree

-3847.84 kcal/mol

-16099.35 kJ/mol
